# Supplementary material
Source: publisher figshare collection journal article supplement (https://gsajournals.figshare.com/ndownloader/files/21818715)
Supplement: Supplementary file 1 [file 21818715]

## Sheet: Melanin A. fulminans
Gene	A. fumigatus*	A. niger	Description	A fulminans/A. Fumigatus*	A fulminans/A. Niger
DHN-melanin pathway	DHN-melanin pathway	DHN-melanin pathway	DHN-melanin pathway
Pks1		An03g05440	Polyketide synthase
Pks1	Afu4g00210 (EncA)	An04g09530	Polyketide synthase	g1269.t1_CBS136243	g755.t1_CBS136243
Pks1	Afu4g14560	An09g05730 (FwnA)	Polyketide synthase	g1269.t1_CBS136243	g3392.t1_CBS136243
Pks1	Afu7g00160	An11g07310	Polyketide synthase
Ayg1	Afu2g17550(Ayg1)	An14g05350 (Ayg1)	Abhydrolase	g2590.t1_CBS136243	g1406.t1_CBS136243
Ayg1			Abhydrolase
Arp2	Afu2g17560 (Arp2)	An02g00220	1,3,6,8-tetrahydroxynaphthalene reductase	g5652.t1_CBS136243	g1406.t1_CBS136243
Arp1	Afu2g17580 (Arp1)	An08g09920	Scytalone dehydratase	g6319.t1_CBS136243	g1269.t1_CBS136243
Abr2	Afu2g17530 (Abr2)	An01g13660 (McoB)	Fungal pigment MCO	g5803.t1_CBS136243	g1269.t1_CBS136243
Abr2	Afu1g15670	An01g14010 (McoA)	Fungal pigment MCO	g5803.t1_CBS136243	g5981.t1_CBS136243
Abr2		An03g03750 (McoC)	Fungal pigment MCO		g8228.t1_CBS136243
Abr2		An04g10400 (McoO)	Fungal pigment MCO		g1269.t1_CBS136243
Abr2		An05g02540 (McoP)	Fungal pigment MCO		g755.t1_CBS136243
Abr1	Afu2g17540 (Abr1) Afu5g03790 (FetC)	An14g05370 (BrnA) An01g11120 (McoE)	Fungal ferroxidase	g5636.t1_CBS136243	g5636.t1_CBS136243 G5803.t1_CBS136243
Abr1	Afu2g17540 (Abr1) Afu5g03790 (FetC)	An01g08960 (McoH)	Fungal ferroxidase	g5636.t1_CBS136243	g5803.t1_CBS136243
Abr1	Afu2g17540 (Abr1) Afu5g03790 (FetC)	An15g05520 (McoK)	Fungal ferroxidase	g5636.t1_CBS136243	g6319.t1_CBS136243
Abr1	Afu2g17540 (Abr1) Afu5g03790 (FetC)		Fungal ferroxidase	g5636.t1_CBS136243
Abr1	Afu2g17540 (Abr1) Afu5g03790 (FetC)		Fungal ferroxidase	g5636.t1_CBS136243
DOPA-melanin pathway
melC2	Afu3g01070	An01g09220 (MelC2)	Tyrosinase	g1315.t1_CBS136243	g1315.t1_CBS136243
melC2	Afu3g01070	An03g00280	Tyrosinase		g8230.t1_CBS136243
melO		An12g01670	Tyrosinase		g5803.t1_CBS136243
		An09g02980	Tyrosinase		g5981.t1_CBS136243
		An09g02980	Tyrosinase		g5981.t1_CBS136243
	Afu4g14490	An12g05810 (McoJ)	Laccase	g5981.t1_CBS136243	g755.t1_CBS136243
	Afu4g14490	An16g02020 (McoM)	Laccase	g5981.t1_CBS136243	g5209.t1_CBS136243
	Afu4g14490	An11g03580 (McoD)	Laccase	g5981.t1_CBS136243	g6241.t1_CBS136243
	Afu4g14490	An08g08450 (McoG)	Laccase	g5981.t1_CBS136243	g5636.t1_CBS136243
	Afu4g14490	An05g02340 (McoF)	Laccase	g5981.t1_CBS136243	g7496.t1_CBS136243
	Afu4g14490	An01g00860 (McoN)	Laccase	g5981.t1_CBS136243	g5803.t1_CBS136243
	Afu4g14490	An18g02690 (McoI)	Laccase	g5981.t1_CBS136243	g5803.t1_CBS136243
L-Tyrosine degradation pathway
Tat	Afu2g13630	An02g05540	tyrosine aminotransferase	g6241.t1_CBS136243	g1269.t1_CBS136243
hppD	Afu2g04200	An11g02200	4-hydroxyphenylpyruvate dioxygenase	g2039.t1_CBS136243	g3058.t1_CBS136243
hmgA	Afu2g04220	An11g02180	homogentisate dioxygenase	g8228.t1_CBS136243	g5981.t1_CBS136243
fahA	Afu2g04230	An11g02170	fumarylacetoacetate hydrolase	g8230.t1_CBS136243	g755.t1_CBS136243
maiA	Afu2g04240	An11g02160	maleylacetoacetate isomerase	g5209.t1_CBS136243	g3392.t1_CBS136243

## Sheet: Blast Coverage
GenBank_QUERY	COVERAGE	GenBank_A_fulminans									GenBank_QUERY	COVERAGE	GenBank_A_fulminans
XP_001388530.2	CoverageQuery= 100%	g5981.t1_CBS136243									XP_746435.1	CoverageQuery= 90%	g1269.t1_CBS136243
XP_001389317.1	CoverageQuery= 91%	g3392.t1_CBS136243									XP_746913.1	CoverageQuery= 91%	g1269.t1_CBS136243
XP_001389342.1	CoverageQuery= 90%	g1406.t1_CBS136243									XP_747965.2	CoverageQuery= 98%	g5636.t1_CBS136243
XP_001389525.2	CoverageQuery= 89%	g5636.t1_CBS136243									XP_748428.1	CoverageQuery= 96%	g1315.t1_CBS136243
XP_001389767.1	CoverageQuery= 96%	g5803.t1_CBS136243									XP_749552.1	CoverageQuery= 95%	g2039.t1_CBS136243
XP_001389800.1	CoverageQuery= 96%	g5803.t1_CBS136243									XP_749554.1	CoverageQuery= 100%	g8228.t1_CBS136243
XP_001389935.1	CoverageQuery= 95%	g1315.t1_CBS136243									XP_749555.1	CoverageQuery= 100%	g8230.t1_CBS136243
XP_001390256.1	CoverageQuery= 96%	g5803.t1_CBS136243									XP_749556.1	CoverageQuery= 96%	g5209.t1_CBS136243
XP_001390425.2	CoverageQuery= 100%	g1269.t1_CBS136243									XP_751377.1	CoverageQuery= 99%	g1269.t1_CBS136243
XP_001390802.1	CoverageQuery= 95%	g5981.t1_CBS136243									XP_751384.1	CoverageQuery= 93%	g5981.t1_CBS136243
XP_001390822.1	CoverageQuery= 98%	g5803.t1_CBS136243									XP_752933.1	CoverageQuery= 95%	g5803.t1_CBS136243
XP_001392958.1	CoverageQuery= 91%	g755.t1_CBS136243									XP_755696.1	CoverageQuery= 100%	g6241.t1_CBS136243
XP_001393100.1	CoverageQuery= 90%	g6319.t1_CBS136243									XP_756088.2	CoverageQuery= 99%	g5803.t1_CBS136243
XP_001393614.2	CoverageQuery= 99%	g1406.t1_CBS136243									XP_756089.2	CoverageQuery= 80%	g5636.t1_CBS136243
XP_001393884.2	CoverageQuery= 100%	g1269.t1_CBS136243									XP_756090.1	CoverageQuery= 99%	g2590.t1_CBS136243
XP_001394218.1	CoverageQuery= 95%	g5209.t1_CBS136243									XP_756091.1	CoverageQuery= 90%	g5652.t1_CBS136243
XP_001394219.2	CoverageQuery= 86%	g8230.t1_CBS136243									XP_756093.1	CoverageQuery= 94%	g6319.t1_CBS136243
XP_001394220.1	CoverageQuery= 99%	g8228.t1_CBS136243
XP_001394222.1	CoverageQuery= 95%	g2039.t1_CBS136243
XP_001394357.1	CoverageQuery= 100%	g755.t1_CBS136243
XP_001394705.1	CoverageQuery= 89%	g1269.t1_CBS136243
XP_001395254.1	CoverageQuery= 66%	g7496.t1_CBS136243
XP_001395646.1	CoverageQuery= 76%	g755.t1_CBS136243
XP_001397081.2	CoverageQuery= 95%	g3392.t1_CBS136243
XP_001397515.2	CoverageQuery= 86%	g755.t1_CBS136243
XP_001398728.2	CoverageQuery= 100%	g5981.t1_CBS136243
XP_001399160.1	CoverageQuery= 94%	g3058.t1_CBS136243
XP_001399690.1	CoverageQuery= 100%	g6241.t1_CBS136243
XP_001401158.1	CoverageQuery= 98%	g2590.t1_CBS136243
XP_001401160.2	CoverageQuery= 99%	g5636.t1_CBS136243
XP_001402309.2	CoverageQuery= 89%	g1269.t1_CBS136243
XP_001402394.1	CoverageQuery= 91%	g5803.t1_CBS136243

## Sheet: Melanin table S8 (Teixeira et. al, 2017)
Gene	A. fumigatus*	A. niger	Description
				Exophiala dermatitidis	Capronia coronata	Capronia epimyces	Exophiala sideris	Exophiala xenobiotica	Exophiala oligosperma	Exophiala spinifera	Rhinocladiella mackenziei	Cladophialophora immunda	Fonsecaea multimorphosa	Fonsecaea pedrosoi	Cladophialophora bantiana	Cladophialophora psammophila	Cladophialophora carrionii	Cladophialophora yegresii	Capronia semiimmersa	Exophiala mesophila	Exophiala aquamarina	Phialophora europaea	Phialophora attae	Verruconis gallopava	Coniosporium apollinis
DHN-melanin pathway
Pks1		An03g05440	Polyketide synthase	HMPREF1120_03173	A1O1_02207	A1O3_00578, A1O3_02705	PV11_01916	PV05_00906, PV05_01564, PV05_06233	PV06_04654, PV06_06356	PV08_08641, PV08_09488	Z518_00818, Z518_03561, Z518_10961	PV07_05308, PV07_10015, PV07_12338	Z520_02947, Z520_08005, Z520_10227	Z517_06418, Z517_12191	Z519_08474, Z519_11905	A1O5_01207, A1O5_01363	G647_03926, G647_08240, G647_08914	A1O7_02402, A1O7_04751	PV04_04499	PV10_04114	A1O9_00564, A1O9_09099	HMPREF1541_10287	KPI36439	PV09_01420, PV09_03835, PV09_06930, PV09_07638	W97_00496, W97_04412, W97_04581
Pks1	Afu4g00210 (EncA)	An04g09530	Polyketide synthase
Pks1	Afu4g14560	An09g05730 (FwnA)	Polyketide synthase
Pks1	Afu7g00160	An11g07310	Polyketide synthase
Ayg1	Afu2g17550(Ayg1)	An14g05350 (Ayg1)	Abhydrolase	HMPREF1120_00377		A1O3_08886	PV11_09299	PV05_09492	PV06_05806		Z518_04579	PV07_09602	Z520_10325	Z517_02054	Z519_04513	A1O5_12239	G647_01705	A1O7_01624	PV04_00318	PV10_02300	A1O9_12943			PV09_01375
Ayg1			Abhydrolase	HMPREF1120_02312	A1O1_02354	A1O3_00818	PV11_02115	PV05_06537	PV06_06408	PV08_08066	Z518_00148	PV07_05039	Z520_05082	Z517_06190	Z519_06487	A1O5_07014	G647_03620	A1O7_05046	PV04_04170	PV10_06793	A1O9_08991	HMPREF1541_01613	KPI35267	PV09_09604	W97_07417
Arp2	Afu2g17560 (Arp2)	An02g00220	1,3,6,8-tetrahydroxynaphthalene reductase	HMPREF1120_05939	A1O1_00481	A1O3_02388	PV11_07743	PV05_11453	PV06_03128	PV08_05722	Z518_03879	PV07_10312	Z520_10872	Z517_08529	Z519_03147	A1O5_03829	G647_00428	A1O7_00392	PV04_01678	PV10_07882	A1O9_04437	HMPREF1541_05718	KPI35046	PV09_05372	W97_03334
Arp1	Afu2g17580 (Arp1)	An08g09920	Scytalone dehydratase	HMPREF1120_07724	A1O1_05507	A1O3_09092	PV11_09245	PV05_09603	PV06_05442	PV08_01892	Z518_09086	PV07_10888	Z520_11509	Z517_09985	Z519_07416	A1O5_02885	G647_03339	A1O7_06767	PV04_07188	PV10_03129	A1O9_01373	HMPREF1541_10592	KPI44823	PV09_00935	W97_06391
Abr2	Afu2g17530 (Abr2)	An01g13660 (McoB)	Fungal pigment MCO	HMPREF1120_02828	A1O1_05915	A1O3_01104	PV11_08126	PV05_11627	PV06_03048	PV08_05311	Z518_04138	PV07_01831	Z520_02982	Z517_07998	Z519_10739	A1O5_06283	G647_00781	A1O7_00735	PV04_01301	PV10_08892	A1O9_06481	HMPREF1541_00358	KPI44094
Abr2	Afu1g15670	An01g14010 (McoA)	Fungal pigment MCO	HMPREF1120_05645	A1O1_00192	A1O3_03112	PV11_03642	PV05_07210	PV06_04804, PV06_07052	PV08_03095, PV08_07236	Z518_01967	PV07_02829, PV07_03882	Z520_02610	Z517_00442	Z519_11293	A1O5_10417	G647_08702	A1O7_02196	PV04_02379	PV10_01038	A1O9_01685, A1O9_08929	HMPREF1541_02772
Abr2		An03g03750 (McoC)	Fungal pigment MCO
Abr2		An04g10400 (McoO)	Fungal pigment MCO
Abr2		An05g02540 (McoP)	Fungal pigment MCO
Abr1	Afu2g17540 (Abr1) Afu5g03790 (FetC)	An14g05370 (BrnA) An01g11120 (McoE)	Fungal ferroxidase	HMPREF1120_01590, HMPREF1120_04510	A1O1_06752	A1O3_04282, A1O3_10392	PV11_05938	PV05_02872	PV06_06337, PV06_08474	PV08_06785, PV08_08664	Z518_02600, Z518_06281	PV07_01595, PV07_02672	Z520_11589	Z517_00275, Z517_04450	Z519_09337, Z519_11106	A1O5_08113, A1O5_10611	G647_01847, G647_09047	A1O7_03907	PV04_02694, PV04_05422	PV10_03450, PV10_07334	A1O9_07847, A1O9_10010	HMPREF1541_00546	KPI42463	PV09_04001	W97_01610
Abr1	Afu2g17540 (Abr1) Afu5g03790 (FetC)	An01g08960 (McoH)	Fungal ferroxidase	HMPREF1120_00173					PV06_04096	PV08_06558	Z518_05551	PV07_11562	Z520_00097	Z517_02953	Z519_01028	A1O5_09568					A1O9_06592	HMPREF1541_03914	KPI38272
Abr1	Afu2g17540 (Abr1) Afu5g03790 (FetC)	An15g05520 (McoK)	Fungal ferroxidase	see above
Abr1	Afu2g17540 (Abr1) Afu5g03790 (FetC)		Fungal ferroxidase	HMPREF1120_03706			PV11_08058	PV05_10886	PV06_03678	PV08_06098							G647_05259	A1O7_03135	PV04_03310	PV10_06791	A1O9_05254	HMPREF1541_08833	KPI37991
Abr1	Afu2g17540 (Abr1) Afu5g03790 (FetC)		Fungal ferroxidase	HMPREF1120_04536, HMPREF1120_04537	A1O1_07051, A1O1_07052	A1O3_04308, A1O3_04309	PV11_03646	PV05_07369, PV05_07370	PV06_07783	PV08_03294, PV08_03295	Z518_02694, Z518_02695	PV07_02492, PV07_02493	Z520_11078, Z520_11079	Z517_00091, Z517_00092	Z519_10898	A1O5_10231, A1O5_10232	G647_09828, G647_09829	A1O7_02017, A1O7_02018	PV04_02211, PV04_02212, PV04_02213	PV10_03480	A1O9_06799, A1O9_06803	HMPREF1541_01944	KPI37632	PV09_07938
DOPA-melanin pathway
melC2	Afu3g01070	An01g09220 (MelC2)	Tyrosinase	HMPREF1120_05316	A1O1_07228	A1O3_04493	PV11_04637	PV05_07032	PV06_04948	PV08_10956	Z518_02360	PV07_01712	Z520_02517	Z517_04317	Z519_11185	A1O5_05663	G647_08944	A1O7_02435	PV04_02597	PV10_01628	A1O9_10721, A1O9_10783	HMPREF1541_07327	KPI45556		W97_00148
melC2	Afu3g01070	An03g00280	Tyrosinase
melO		An12g01670	Tyrosinase	HMPREF1120_07692	A1O1_05311	A1O3_09452	PV11_01536	PV05_04823	PV06_00990	PV08_00541	Z518_09300	PV07_11411	Z520_05229	Z517_02786	Z519_06981	A1O5_02449	G647_02663	A1O7_07422	PV04_07887		A1O9_04313	HMPREF1541_08381	KPI45250	PV09_03501	W97_03015
		An09g02980	Tyrosinase	HMPREF1120_03345	A1O1_01899	A1O3_00300		PV05_02519	PV06_01756	PV08_02576	Z518_00206	PV07_05227	Z520_10157	Z517_06336	Z519_06319	A1O5_07181	G647_03851	A1O7_04820	PV04_04426		A1O9_09105	HMPREF1541_01446, HMPREF1541_08624	KPI42540, KPI43615
		An09g02980	Tyrosinase	HMPREF1120_04514	A1O1_07125	A1O3_04286	PV11_03672	PV05_07543	PV06_07819	PV08_03330	Z518_02604	PV07_01600	Z520_02376	Z517_04444	Z519_09329	A1O5_13340	G647_09055	A1O7_02545	PV04_02706		A1O9_07852	HMPREF1541_00714	KPI38810
	Afu4g14490	An12g05810 (McoJ)	Laccase	HMPREF1120_05865	A1O1_00055	A1O3_02170	PV11_08539	PV05_10982	PV06_03979	PV08_06261		PV07_10351	Z520_04209	Z517_08561	Z519_03181	A1O5_03863	G647_00377	A1O7_00344	PV04_01723	PV10_01870	A1O9_05728	HMPREF1541_07343		PV09_07568	W97_06255
	Afu4g14490	An16g02020 (McoM)	Laccase	HMPREF1120_00199	A1O1_01208	A1O3_08789		PV05_03083	PV06_08122	PV08_06923	Z518_02721	PV07_05315	Z520_10237	Z517_06426	Z519_08463	A1O5_01196	G647_03930	A1O7_04747	PV04_04502	PV10_07934	A1O9_02625
	Afu4g14490	An11g03580 (McoD)	Laccase	HMPREF1120_08116	A1O1_04469	A1O3_01709, A1O3_08380	PV11_02031, PV11_05551	PV05_04026, PV05_06499	PV06_01778, PV06_06553	PV08_02600, PV08_10122	Z518_07225, Z518_11206	PV07_04630	Z520_04705	Z517_05778, Z517_06970	Z519_06915	A1O5_00803, A1O5_11113	G647_03384	A1O7_05297	PV04_03903	PV10_06420	A1O9_11787, A1O9_12690	HMPREF1541_01301, HMPREF1541_05507	KPI35380, KPI39351
	Afu4g14490	An08g08450 (McoG)	Laccase	HMPREF1120_04578, HMPREF1120_08564	A1O1_07020	A1O3_03561, A1O3_04346, A1O3_06406	PV11_03890	PV05_07414	PV06_03290, PV06_07758	PV08_03596	Z518_07732	PV07_04502, PV07_08470	Z520_01948, Z520_07825		Z519_05812, Z519_11519	A1O5_07235, A1O5_10986			PV04_10692	PV10_08492		HMPREF1541_00468, HMPREF1541_01991	KPI37111	PV09_01768, PV09_02218	W97_05232
	Afu4g14490	An05g02340 (McoF)	Laccase	see above
	Afu4g14490	An01g00860 (McoN)	Laccase	HMPREF1120_02754	A1O1_05783	A1O3_03573		PV05_11921			Z518_04515	PV07_02104	Z520_07076	Z517_07745	Z519_09065	A1O5_06599	G647_00922	A1O7_00868	PV04_01151	PV10_08610	A1O9_05975	HMPREF1541_00307
	Afu4g14490	An18g02690 (McoI)	Laccase
L-Tyrosine degradation pathway
Tat	Afu2g13630	An02g05540	tyrosine aminotransferase	HMPREF1120_02164	A1O1_05081	A1O3_03898	PV11_01436	PV05_04711	PV06_00330	PV08_04196	Z518_09534	PV07_11516	Z520_00053	Z517_02907	Z519_07109	A1O5_02579	G647_02757	A1O7_07335	PV04_07792	PV10_07254	A1O9_03882	HMPREF1541_08062	KPI36122	PV09_01861	W97_01229
hppD	Afu2g04200	An11g02200	4-hydroxyphenylpyruvate dioxygenase	HMPREF1120_05584		A1O3_07212	PV11_00495	PV05_04546	PV06_00573	PV08_04003	Z518_08674	PV07_03889	Z520_03701	Z517_00769	Z519_04153	A1O5_10017	G647_06922	A1O7_05606	PV04_05972	PV10_07438	A1O9_04551	HMPREF1541_06659	KPI46011	PV09_03109	W97_07293
hmgA	Afu2g04220	An11g02180	homogentisate dioxygenase	HMPREF1120_03827	A1O1_06376	A1O3_09997	PV11_07447	PV05_08457	PV06_02479, PV06_11291	PV08_02623	Z518_05388	PV07_03517, PV07_05571	Z520_09799	Z517_01172	Z519_03753	A1O5_08900	G647_06522	A1O7_06014	PV04_06398	PV10_08191	A1O9_07977	HMPREF1541_01525	KPI36553	PV09_02442	W97_00628
fahA	Afu2g04230	An11g02170	fumarylacetoacetate hydrolase	HMPREF1120_03825	A1O1_06378	A1O3_09999	PV11_07445	PV05_08459	PV06_02477	PV08_02625	Z518_05386	PV07_03521	Z520_09797	Z517_01170	Z519_03755	A1O5_08898	G647_06520	A1O7_06016	PV04_06401	PV10_08193	A1O9_07975	HMPREF1541_01527	KPI36590	PV09_02443	W97_00627
maiA	Afu2g04240	An11g02160	maleylacetoacetate isomerase	HMPREF1120_03438		A1O3_00126	PV11_01949	PV05_02444	PV06_01680	PV08_02445	Z518_00072	PV07_04918	Z520_04947	Z517_06026	Z519_06629	A1O5_06871	G647_03643	A1O7_05023	PV04_04192, PV04_10657	PV10_04078	A1O9_09087	HMPREF1541_08676	KPI36473		W97_05376
